# Supplementary figures and images for: A stochastic neuronal model predicts random search behaviors at multiple spatial scales in C. elegans
Source: eLife journal article supplement (doi:10.7554/elife.12572), 2016-01-28

Figure 1—figure supplement 1

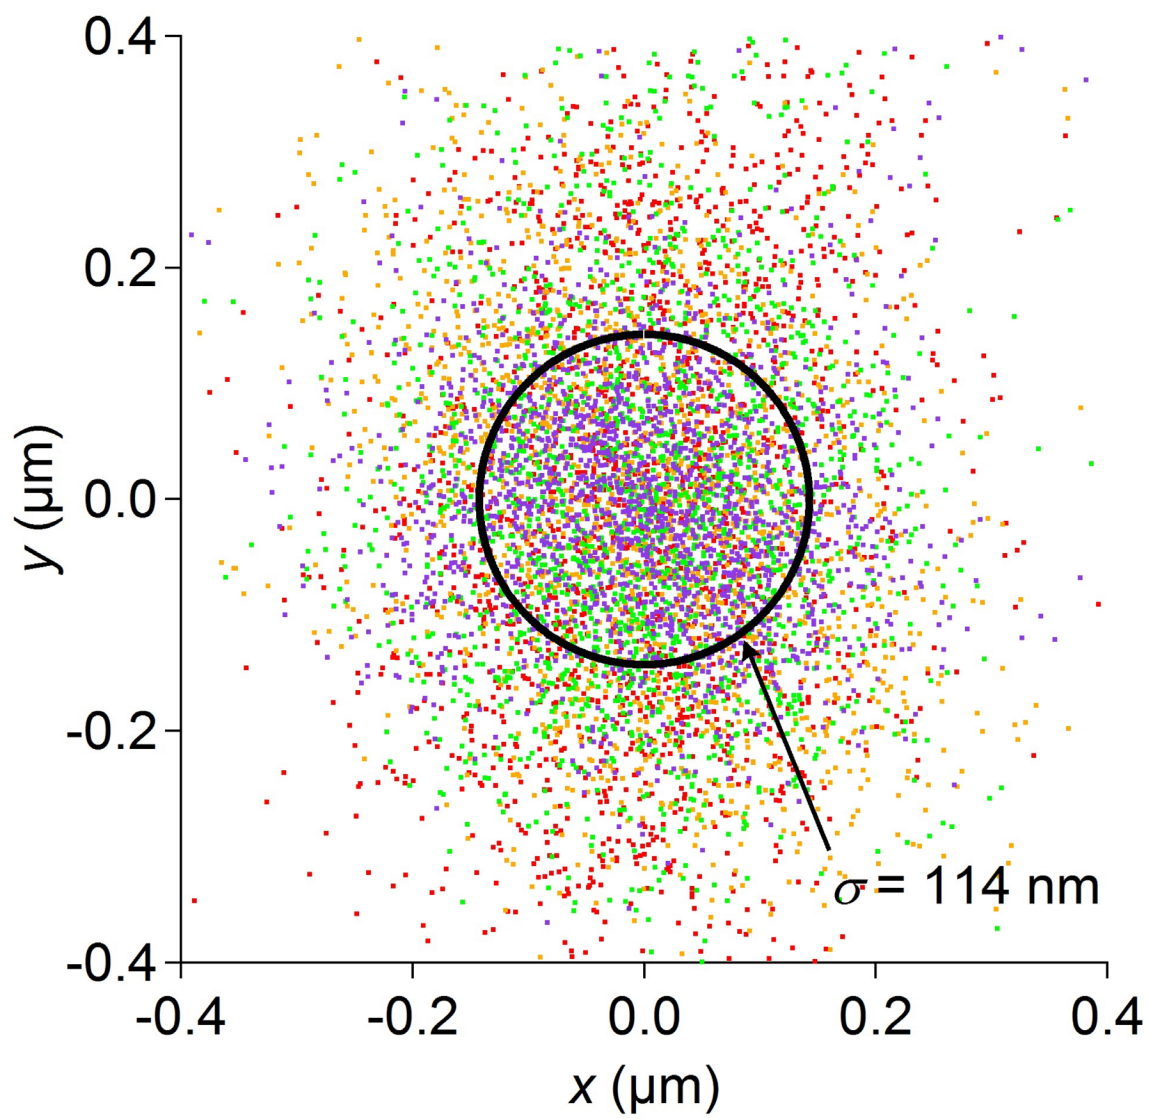

Supplement: supp [file elife_poa_e12572_Figure_1_figure_supplement_1.pdf › elife_poa_e12572_Figure_1_figure_supplement_1.pdf]

Figure 1—figure supplement 2

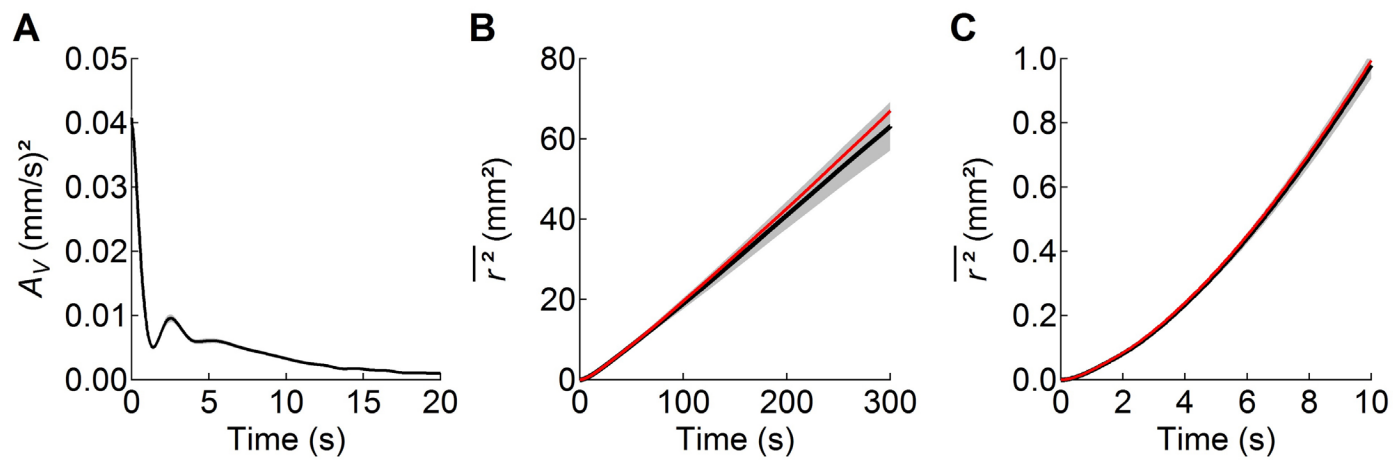

Supplement: supp [file elife_poa_e12572_Figure_1_figure_supplement_2.pdf › elife_poa_e12572_Figure_1_figure_supplement_2.pdf]

Figure 2—figure supplement 1

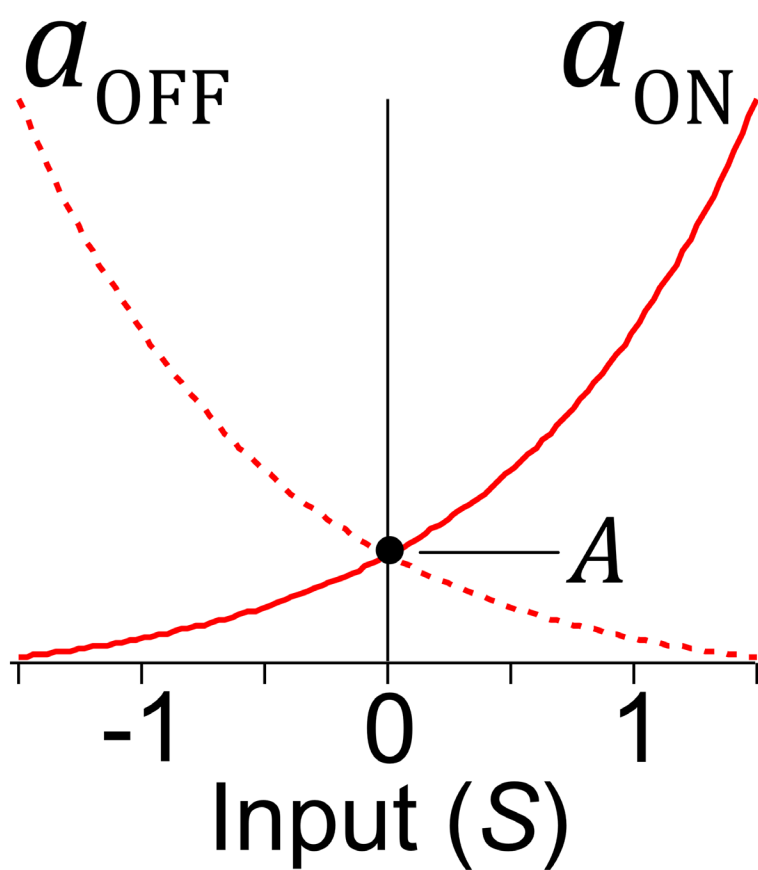

Supplement: supp [file elife_poa_e12572_Figure_2_figure_supplement_1.pdf › elife_poa_e12572_Figure_2_figure_supplement_1.pdf]

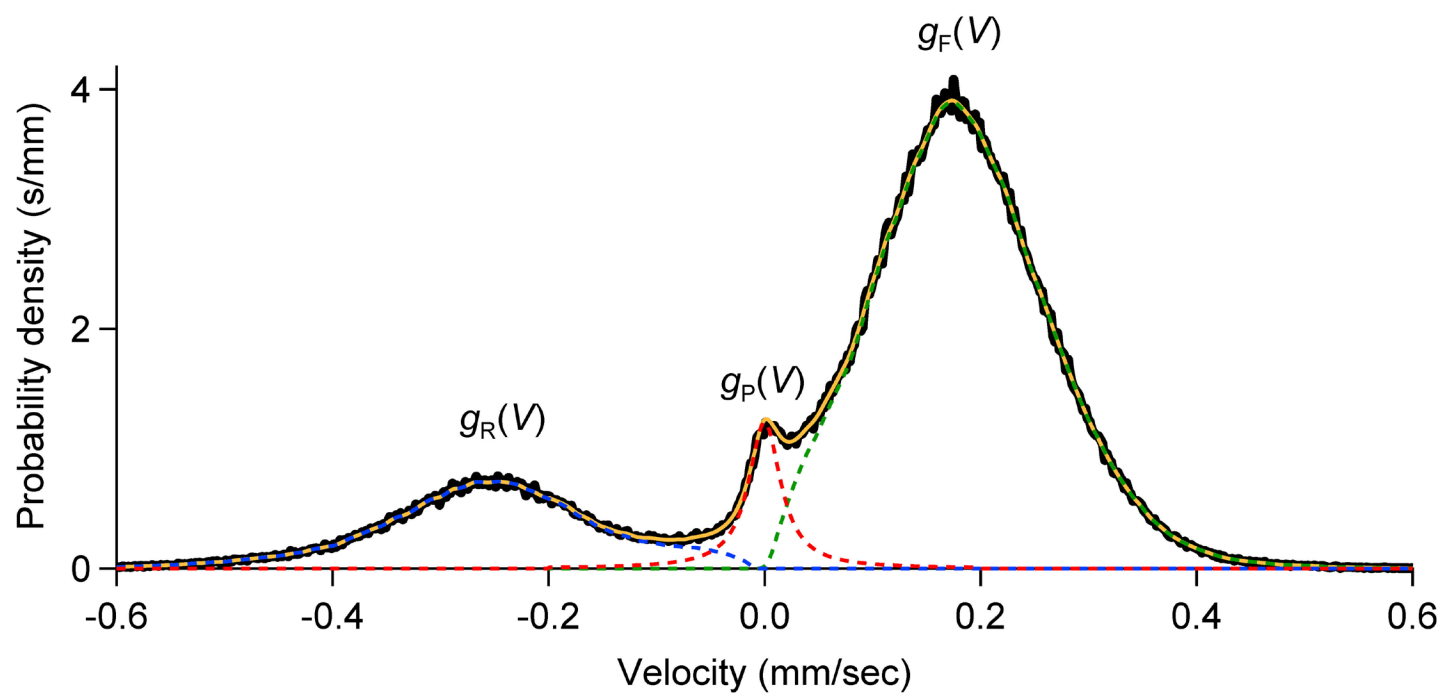

Supplement: supp [file elife_poa_e12572_Figure_2_figure_supplement_2.pdf › elife_poa_e12572_Figure_2_figure_supplement_2.pdf]

Figure 2—figure supplement 3

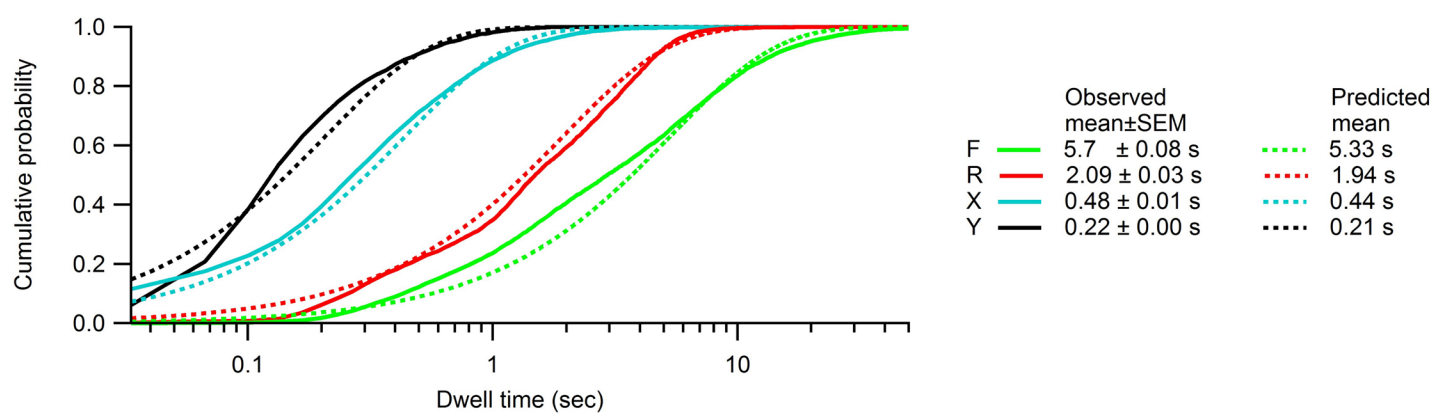

Supplement: supp [file elife_poa_e12572_Figure_2_figure_supplement_3.pdf › elife_poa_e12572_Figure_2_figure_supplement_3.pdf]

Figure 8—figure supplement 1

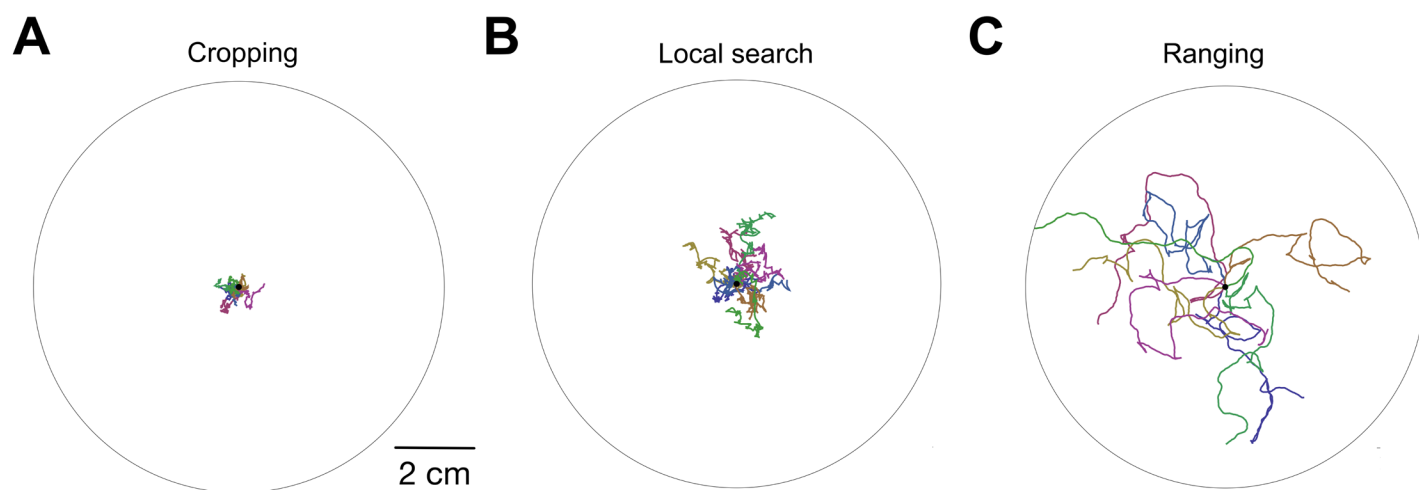

Supplement: supp [file elife_poa_e12572_Figure_8_figure_supplement_1.pdf › elife_poa_e12572_Figure_8_figure_supplement_1.pdf]

Figure 8—figure supplement 2

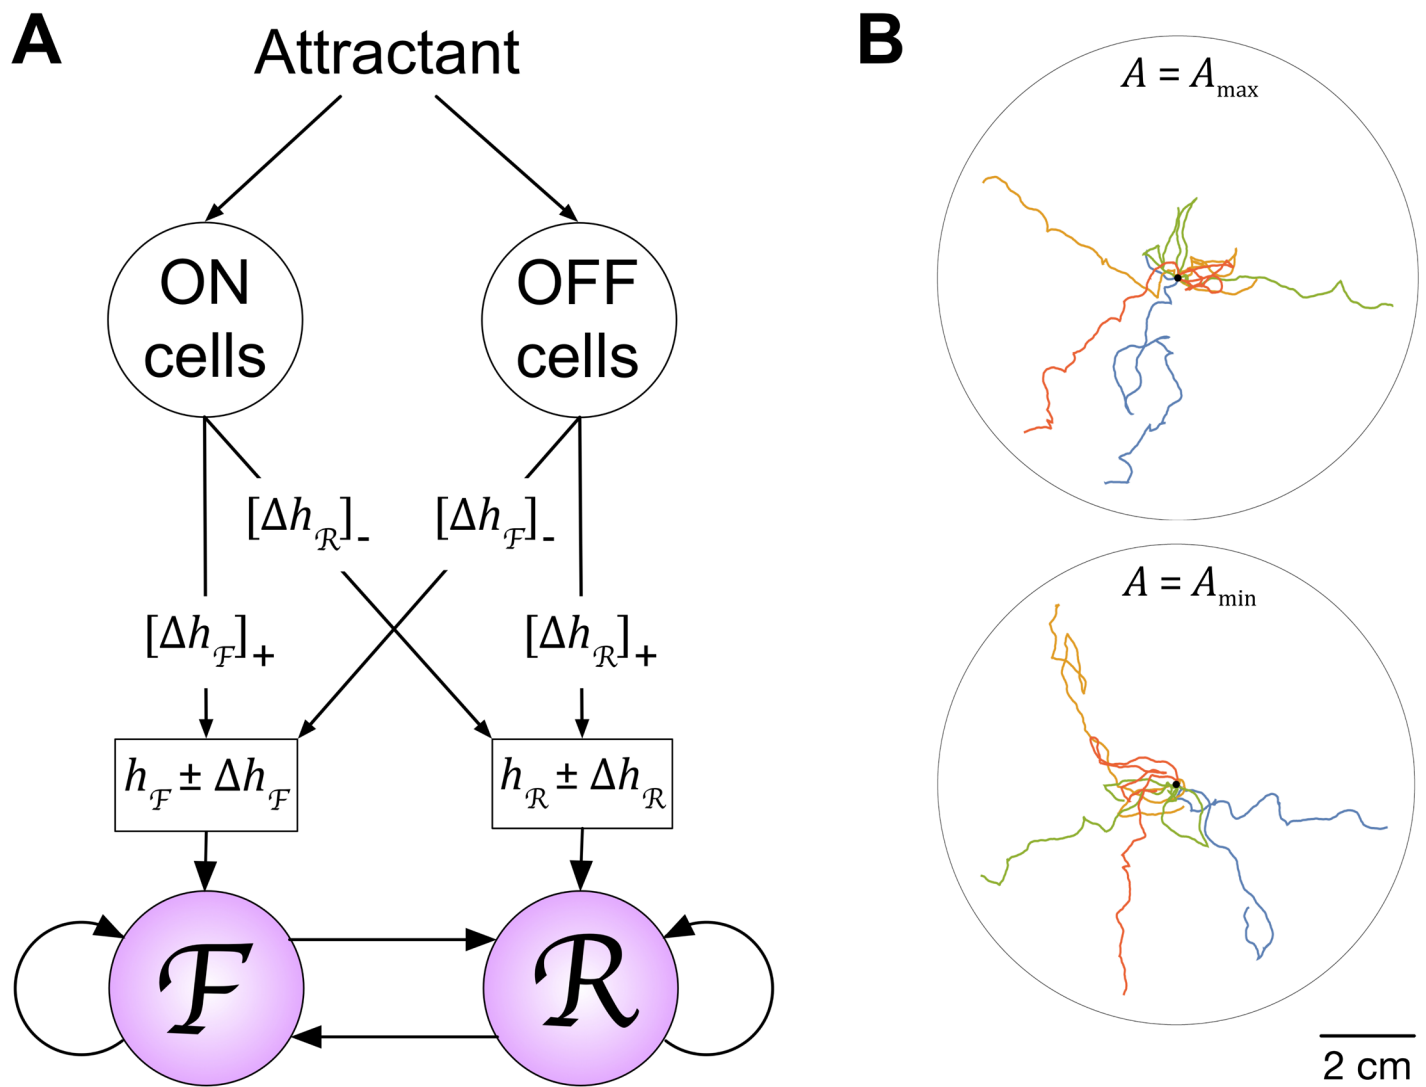

Supplement: supp [file elife_poa_e12572_Figure_8_figure_supplement_2.pdf › elife_poa_e12572_Figure_8_figure_supplement_2.pdf]
